# Supplementary figures and images for: Scoring criteria for portable monitor recordings: a comparison of four hypopnoea definitions in a population-based cohort
Source: HighWire-hosted journal article supplement (doi:10.1136/thoraxjnl-2014-205982), 2015-08-20

Figure S1

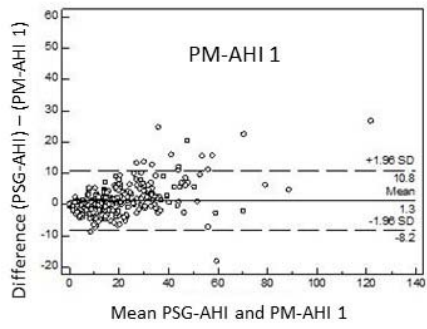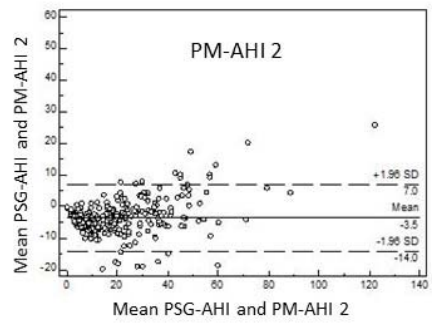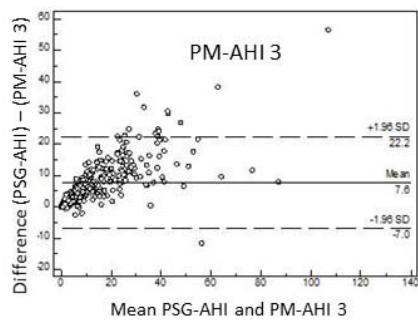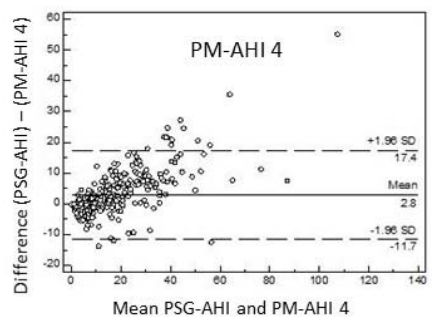

Supplement: thoraxjnl-2014-205982supp_figure.pdf [file thoraxjnl-2014-205982supp_figure.pdf]
